# Supplementary material for: Exploring patient involvement in obstetrics and gynaecology education for medical students: a scoping review protocol
Source: PubMed Central journal article supplement — BMJ Open. 2024 Nov 18;14(11):e089287. doi: 10.1136/bmjopen-2024-089287 (PMC11575323; doi:10.1136/bmjopen-2024-089287), 2024-11-18
Supplement: bmjopen-14-11-s001.pdf [file bmjopen-14-11-s001.pdf]

## Supplemental File 1: Sample search strategy

("Patient Educator" OR "Patient teacher" OR "Patient as teacher" OR "Patient-as-teacher" OR "Patient tutor" OR "Patient instructor" OR "Patient expert" OR "Professional patient" OR "Teaching associate" OR "Standardised patient" OR "Standardized patient" OR "Gynecological teaching associate" OR "Gynaecological teaching associate" OR "Gynae teaching associate" OR "Patient Participation"[Mesh] OR "Patient participation" OR "patient involve\*" OR "patient engag\*" OR "patient collaborat\*" OR "stakeholder participation" OR "patient contribut\*" OR "community engagement" OR "Patient represent\*" OR "Real patient" OR "narrative medicine" OR "patient narrative" OR "patient-led" OR "patient-directed") AND ("Obstetrics"[Mesh] OR "Gynecology"[Mesh] OR "Obstetric\*" OR "Obstetrics and Gynaecology" OR "Gynaecolog\*" OR "Gynecolog\*" OR "Maternal Health"[Mesh] OR "Sexual Health"[Mesh] OR "Reproductive Health"[Mesh]) AND ("Undergraduate Medical education" OR "Education, Medical, Undergraduate"[Mesh] OR "Medical education" OR "Medical student education" OR "Medical Student" OR "Students, Medical"[Mesh] OR "Graduate entry medicine" OR "graduate entry medical student")
