# Supplementary material for: Exploring patient involvement in obstetrics and gynaecology education for medical students: a scoping review protocol
Source: PubMed Central journal article supplement — BMJ Open. 2024 Nov 18;14(11):e089287. doi: 10.1136/bmjopen-2024-089287 (PMC11575323; doi:10.1136/bmjopen-2024-089287), 2024-11-18
Supplement: bmjopen-14-11-s002.pdf [file bmjopen-14-11-s002.pdf]

## Supplemental Table 1.

### Inclusion and Exclusion Criteria

| Inclusion Criteria                                                                                                                                                                                                                                                                                                                                                                                                                                                                                                                                                                                                                                                                                                                              | Exclusion Criteria                                                                                                                                                                                                                                                                                                                                                                                                                                                                                                                                                                                                                                                                                                                                                                                                                                                                                                                                                                               |
|-------------------------------------------------------------------------------------------------------------------------------------------------------------------------------------------------------------------------------------------------------------------------------------------------------------------------------------------------------------------------------------------------------------------------------------------------------------------------------------------------------------------------------------------------------------------------------------------------------------------------------------------------------------------------------------------------------------------------------------------------|--------------------------------------------------------------------------------------------------------------------------------------------------------------------------------------------------------------------------------------------------------------------------------------------------------------------------------------------------------------------------------------------------------------------------------------------------------------------------------------------------------------------------------------------------------------------------------------------------------------------------------------------------------------------------------------------------------------------------------------------------------------------------------------------------------------------------------------------------------------------------------------------------------------------------------------------------------------------------------------------------|
| <ul style="list-style-type: none"><li>• Studies must be published in the English language.</li><li>• Articles must be available in full text.</li><li>• Studies including undergraduate or graduate entry medical students.</li><li>• Study must take place within the specialty of obstetrics and gynaecology. Where mix of specialties found, obstetrics and gynaecology care must be included.</li><li>• Studies must include patient involvement above Towle level 2 – Standardised or volunteer patient in a clinical setting.</li><li>• Must be a primary research study</li><li>• Must involve student-patient interaction – including physical examination.</li><li>• Must describe educational intervention/teaching session</li></ul> | <ul style="list-style-type: none"><li>• Studies not published in the English language.</li><li>• Articles not available in full text.</li><li>• Studies including qualified doctors without medical student involvement.</li><li>• Students including other health professions students with no medical student involvement.</li><li>• Studies involving another area of women’s health with no reference to obstetrics &amp; gynaecology care.</li><li>• Studies below Towle level 1 – electronic or case based scenario.</li><li>• Secondary studies including systematic reviews, scoping reviews and meta-analyses.</li><li>• Commentary, review articles and best practice guidelines.</li><li>• Grey literature including eposters, conference abstracts, theses and dissertations.</li><li>• Studies without student-patient interaction</li><li>• Physical examination outside of pelvic examination</li><li>• No description of the teaching session/educational intervention</li></ul> |
