# Supplementary material for: Exploring patient involvement in obstetrics and gynaecology education for medical students: a scoping review protocol
Source: PubMed Central journal article supplement — BMJ Open. 2024 Nov 18;14(11):e089287. doi: 10.1136/bmjopen-2024-089287 (PMC11575323; doi:10.1136/bmjopen-2024-089287), 2024-11-18
Supplement: bmjopen-14-11-s003.pdf [file bmjopen-14-11-s003.pdf]

**Supplemental Table 2**

| <b>Sample data extraction table</b> |                                                                                                                                                                                                                                                             |
|-------------------------------------|-------------------------------------------------------------------------------------------------------------------------------------------------------------------------------------------------------------------------------------------------------------|
| Reference                           | Author name<br>Title<br>Year of publication<br>Journal                                                                                                                                                                                                      |
| Details of study                    | Study Aims<br>Number of participants<br>Characteristics of study population<br>Patient characteristics<br>Location<br>Study duration<br>Study Methodology<br>Level of patient involvement according to<br>Tew Ladder of Involvement and Towle's<br>taxonomy |
| Study Outcomes                      | Kirkpatrick levels<br>Patient perspective<br>Student perspective<br>Data Collection & Analysis                                                                                                                                                              |
| Ethical considerations              | Patient training for study<br>Method of obtaining consent<br>Negative feedback from patients/students                                                                                                                                                       |
